# Supplementary material for: Response to stereotactic ablative radiotherapy in a novel orthotopic model of non-small cell lung cancer
Source: PubMed Central journal article supplement (PMC5788587; doi:10.18632/oncotarget.22727), 2017-11-28
Supplement: oncotarget-09-1630-s001.pdf [file oncotarget-09-1630-s001.pdf]

## Response to stereotactic ablative radiotherapy in a novel orthotopic model of non-small cell lung cancer

### SUPPLEMENTARY MATERIALS

**Supplementary Table 1: Characteristics of tumor-derived A549 cell lines**

| Cell line ID | Treatment | Endpoint | Site of cell line |
|--------------|-----------|----------|-------------------|
| A549R16      | None      | Control  | Primary           |
| A549R1       | 34 Gy     | 30 days  | Primary           |
| A549R10      | 34 Gy     | 10 days  | Primary           |

**Supplementary Table 2: Relative expression of genes involved in adhesion/migration in A549 cells derived from sham-treated tumors or tumors harvested early and late after SABR**

|          | Relative gene expression (St.Dev.) |             |             |
|----------|------------------------------------|-------------|-------------|
|          | Sham                               | Early       | Late        |
| PPARGC1A | 1.00 (0.40)                        | 17.4 (4.80) | 0.90 (0.30) |
| TSPAN7   | 1.00 (0.10)                        | 17.1 (1.20) | 1.30 (0.20) |
| FN1      | 1.00 (0.01)                        | 9.90 (0.60) | 1.50 (0.10) |
| FST      | 1.00 (0.03)                        | 5.50 (0.20) | 0.60 (0.01) |
| IL-8     | 1.00 (0.10)                        | 3.40 (0.20) | 1.20 (0.10) |
| BMP6     | 1.00 (0.10)                        | 3.40 (0.30) | 1.20 (0.20) |
| COL4A5   | 1.00 (0.10)                        | 3.10 (0.20) | 0.80 (0.10) |
| COL4A6   | 1.00 (0.02)                        | 2.30 (0.10) | 0.60 (0.02) |
| IL20RB   | 1.00 (0.10)                        | 0.10 (0.01) | 1.60 (0.20) |

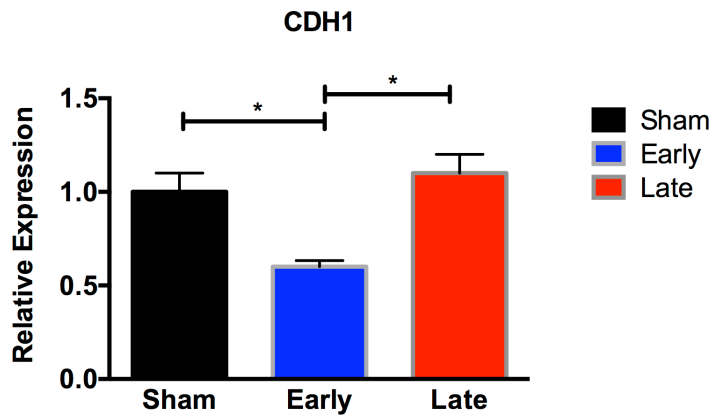

**Supplementary Figure 1: Relative gene expression of CDH1 (E-cadherin) in A549 cells harvested from sham-treated tumors and tumors harvested early and late after SABR.**
